# Supplementary material
Source: HighWire-hosted journal article supplement (https://erj.ersjournals.com/content/57/5/2002533)
Supplement: inline-supplementary-material-1 [file inline-supplementary-material-1.pdf]

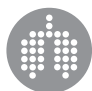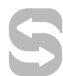

SHAREABLE PDF

# Two sides of the same coin? A review of the similarities and differences between idiopathic pulmonary fibrosis and rheumatoid arthritis-associated interstitial lung disease

Scott Matson<sup>1</sup>, Joyce Lee<sup>2</sup> and Oliver Eickelberg <sup>3</sup>

**Affiliations:** <sup>1</sup>University of Kansas School of Medicine, Division of Pulmonary and Critical Care, Kansas City, KS, USA. <sup>2</sup>University of Colorado, Division of Pulmonary Sciences and Critical Care Medicine, Aurora, CO, USA. <sup>3</sup>University of Pittsburgh Medical Center, Division of Pulmonary and Critical Care, Pittsburgh, PA, USA.

**Correspondence:** Scott Matson, University of Kansas School of Medicine, Division of Pulmonary and Critical Care, 4000 Cambridge St, Mailstop 3007, Kansas City, KS 66160, USA. E-mail: smatson@kumc.edu or scott.matson@cuanschutz.edu

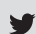

@ERSpublications

**Idiopathic pulmonary fibrosis and rheumatoid arthritis-associated interstitial lung disease have common genetic risks, similar clinical courses and common radiographic features. This review explores the similarities and differences between these diseases.** <https://bit.ly/2UlaZqs>

**Cite this article as:** Matson S, Lee J, Eickelberg O. Two sides of the same coin? A review of the similarities and differences between idiopathic pulmonary fibrosis and rheumatoid arthritis-associated interstitial lung disease. *Eur Respir J* 2021; 57: 2002533 [<https://doi.org/10.1183/13993003.02533-2020>].

This single-page version can be shared freely online.

**ABSTRACT** Rheumatoid arthritis associated interstitial lung disease (RA-ILD) and idiopathic pulmonary fibrosis (IPF) are distinct diseases; however, they share several clinical, radiographic and genetic features. For instance, usual interstitial pneumonia (UIP), which is an ILD pattern required for a diagnosis of IPF, is also the most common ILD pattern in RA-ILD. The presence of UIP in RA-ILD is a poor prognostic sign with outcomes similar to those seen in IPF. The recent finding of a shared genetic susceptibility between IPF and RA-ILD has sparked additional interest in this relationship. This review outlines these similarities and differences in clinical presentation, appearance and outcomes in RA-ILD and IPF.

In addition, this review highlights previous research in molecular biomarkers in both conditions, exploring areas of overlap and distinction. This focus on biomarkers in IPF and RA-ILD aims to highlight potential areas of discovery and clues to a potential shared pathobiology through investigation of novel molecular markers or the repurposing of biomarkers from one condition to the other.

The drive to better understand RA-ILD by leveraging our knowledge of IPF is underscored by our divergent treatment paradigms for these conditions and the concern for potential harm. As a result of advancing our understanding of the links between IPF and RA-ILD, current strategies for diagnosis, screening and treatment of ILD may fundamentally change in the coming years. Until then, clinicians face difficult clinical questions regarding the co-management of the articular disease and the ILD in RA.
